## OPINION

# Rethinking neglected tropical diseases: A shift towards more inclusive and equitable terminology

Marlous L. Grijzen<sup>1,2\*</sup>, Yonah E. Yangaza<sup>3</sup>, Al Kadri<sup>4</sup>, Fidel Strub<sup>5</sup>, Esther E. Freeman<sup>6,7,8</sup>, Wendemagegn Enbiale<sup>9,10</sup>

**1** Oxford University Clinical Research Unit Indonesia, Faculty of Medicine Universitas Indonesia, Jakarta, Indonesia, **2** Nuffield Department of Medicine, Centre for Tropical Medicine and Global Health, University of Oxford, Oxford, United Kingdom, **3** One Health Society, Dar es salaam, Tanzania, **4** PerMaTa, Makassar, Indonesia, **5** Elysium Noma Survivors Association, Basel, Switzerland, **6** Department of Dermatology, Massachusetts General Hospital, Boston, Massachusetts, United States of America, **7** Medical Practice Evaluation Foundation, Massachusetts General Hospital, Boston, Massachusetts, United States of America, **8** International Foundation for Dermatology, London, United Kingdom, **9** Department of Dermatology, College of Health Sciences and Medicine, Bahir Dar University, Bahir Dar, Ethiopia, **10** Collaborative Research and Training Center for Neglected Tropical Diseases, Arba Minch University, Arba Minch, Ethiopia

\* [mgrijzen@oucr.uu.nl](mailto:mgrijzen@oucr.uu.nl)

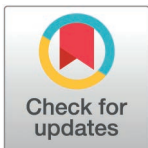

## OPEN ACCESS

**Citation:** Grijzen ML, Yangaza YE, Kadri A, Strub F, Freeman EE, Enbiale W (2025) Rethinking neglected tropical diseases: A shift towards more inclusive and equitable terminology. PLOS Glob Public Health 5(2): e0004094. <https://doi.org/10.1371/journal.pgph.0004094>

**Editor:** Julia Robinson, PLOS: Public Library of Science, UNITED STATES OF AMERICA

**Published:** February 3, 2025

**Copyright:** © 2025 Grijzen et al. This is an open access article distributed under the terms of the [Creative Commons Attribution License](https://creativecommons.org/licenses/by/4.0/), which permits unrestricted use, distribution, and reproduction in any medium, provided the original author and source are credited.

**Funding:** Marlous Grijzen is supported by the Wellcome Africa Asia Programme Vietnam core grant (106680/Z/14/Z). Esther Freeman receives royalties from UpToDate. She receives grant support from the ILDS and from the NIH and serves on the CeraVe Care for All philanthropic advisory board. She is Section Editor for the British Journal of Dermatology. The funders had no role in study design, data collection and analysis, decision to publish, or preparation of the manuscript.

Neglected tropical diseases (NTD) refer to a group of 21 diseases that disproportionately affect impoverished communities in low- and middle-income countries (LMIC) [1]. NTD collectively impact 1.7 billion people, which is about 20% of the world's population [1]. Each year, NTD account for more than 200,000 deaths, with millions left disabled and disfigured due to insufficient access to care and affordable treatment, often leading to social exclusion, stigmatization and discrimination. Although the term NTD has successfully directed funding and resources towards these conditions and encouraged global partnerships and high-level policy initiatives, the term may also have unintended negative consequences. In this paper, we aim to explore the term NTD and stimulate a dialogue that re-evaluates its meaning into more inclusive and equitable language.

Since the 1970s, there has been a growing interest in developing a concerted global response to NTD. This led to the establishment of the WHO NTD-department in 2005, aimed at improving the health and well-being of individuals affected by NTD through coordinated global initiatives, mobilization of funds and the implementation of evidence-based interventions [2]. In 2012, the London Declaration of NTD was launched, uniting governments, pharmaceutical companies, and non-governmental organizations (NGO's) in the fight against NTD. The global response was revitalized with the Kigali Declaration on NTD in 2022, which reaffirmed a collective commitment to adhere to the WHO's 2021–2030 roadmap for NTD control. Significant milestones have been achieved, including a 25% reduction in the number of people requiring interventions, the elimination of at least one NTD in 47 countries, and a substantial drop in the disease burden calculated in disability-adjusted life years [3]. Moreover, in December 2023, noma, one of the world's most underrecognized conditions, was designated by WHO as an NTD.

While recognizing that significant progress has been made, we here explore the potential negative consequences associated with the term NTD. First, the word 'tropical' dates back to the 12<sup>th</sup> century and has historical roots tied to colonial history as European powers established colonies in 'tropical' regions encountering 'exotic' diseases that were prevalent in

**Competing interests:** The authors have declared that no competing interests exist.

those settings. ‘Tropical medicine’ emerged in the 19<sup>th</sup> century and was designed to reinforce colonialism as it was essential to study prevalent diseases that were threatening the white colonizers as mortality rates were high [4]. As the term ‘tropical’ is linked to notions of otherness, exoticism and superiority by colonial powers, this association may instinctively contribute to the perception of NTD as geographically distant and less important, reinforcing a division between the Global North and South. This dynamic reflects deep-rooted power structures, racial biases and accentuates existing health disparities within the field of global health [5].

Second, ‘tropical’ suggests that neglected diseases are confined to geographic areas with a tropical climate, disregarding the reality that some of these diseases are prevalent in or spreading to temperate zones due to shifting epidemiological patterns associated with human behaviour and climate injustice [6]. Examples are scabies, which is endemic across the world, including the Global North, and the emergence of dengue and leishmaniasis in France [7,8], chikungunya in Italy [9] and Chagas disease in Spain [10].

Third, labelling diseases as ‘neglected’ carries a negative perception of communities that often already are marginalized and stigmatized. “When I was diagnosed with leprosy and read it was considered an NTD, I was surprised as so many people in my neighbourhood were affected by this condition.” [*Al Kadri, chair of PerMaTa, an independent locally driven leprosy association by and for persons affected by leprosy in Indonesia*]. Fidel Strub, a noma survivor, advocate, and co-founder and director of Elysium Noma Survivors Association, challenges the use of the term ‘neglected’ due to its controversial nature. He argues that while the term may have significance at a global level, it may also downplay the severity of the issue and imply that only a small percentage of individuals are impacted. Strub believes that labelling the issue as ‘neglected’ diminishes the urgency for change and may not convince governments and donors to invest more. Pejorative language may perpetuate stereotypes and contribute to stigma and discrimination [11]. It is important to understand the meaning of words and the influence language has on shaping attitudes. A powerful example comes from Ethiopia where NTD is translated into ‘tropical diseases needing special attention’ underlining the need for action [12].

Fourth, the term NTD fails to acknowledge the human beings impacted by these conditions. NTD have long existed within communities, yet individuals affected by them have often been ignored. Mathias Duck, a global health advocate and a person with lived experience of leprosy, introduced the term ‘diseases of neglected people’ [13]. He proposes to shift from a disease-centric perspective to one that centres persons affected: listening to their experiences, addressing their needs and involving them in decision-making procedures.

Finally, the word ‘neglected’ may unintentionally signal lack of importance to local governments, potentially leading to less funding and political determination. This perception may reinforce a passive acceptance of the situation, diminish country ownership and encourage reliance on external donors rather than fostering change [12]. “NTD should be seen as a powerful expression, but because the diseases are neglected, our government thinks they are no longer important” [*Al Kadri*]. While the NTD-terminology may convey a sense of urgency and prompt advocacy, it can also paradoxically impede access to essential treatments, preventive measures and innovative research and prolong suffering and avertible disability among affected populations.

The introduction of the term NTD has played a key role in raising awareness, mobilizing political willpower, and securing funding. However, it is time to contemplate the potential sensitivities associated with the terminology and embrace more inclusive person-centred language transcending social and geographical boundaries.

We acknowledge the way forward is complex, with no single term currently identified as ideal. However, several precedents offer valuable insights, i.e., the renaming of problematic

medical eponyms [14] and the emergence of race-conscious medicine [15]. Several schools or departments of tropical medicine have been renamed as schools or institutes of international or global health. Other examples are the shift to ‘person living with HIV’ or ‘person with albinism’, which exemplifies how language can be restructured to prioritize the individual over the medical condition and how community consensus can drive change. To improve the depth of understanding related to NTD, stakeholder consultations and community engagement may help to capture a diverse range of perspectives from individuals affected, the general public, healthcare professionals, NGO’s, local governments and policymakers. Inspired by the Ethiopian example, we propose the term ‘conditions requiring special attention’, which emphasizes the global nature, the focus on achieving health justice for all individuals affected and the need for collective action. Although this term may have limitations, our primary goal is to amplify the voices of those affected and promote dialogue within the global health community to generate alternative suggestions that are more inclusive and respectful of all perspectives.

## Acknowledgments

The authors would like to thank Dr. Keerti Gedela for reviewing the paper. We would like to clarify that the thoughts expressed by Al Kadri and Fidel Strub are their own and do not necessarily represent the views of the organization they represent.

## Author contributions

**Conceptualization:** Marlous L. Grijzen, Yonah E. Yangaza, Esther E. Freeman, Wendemagegn Enbiale, Al Kadri, Fidel Strub.

**Investigation:** Al Kadri, Fidel Strub.

**Supervision:** Esther E. Freeman, Wendemagegn Enbiale.

**Writing – original draft:** Marlous L. Grijzen, Wendemagegn Enbiale.

**Writing – review & editing:** Marlous L. Grijzen, Yonah E. Yangaza, Esther E. Freeman, Wendemagegn Enbiale, Al Kadri, Fidel Strub.

## References

1. Ending the neglect to attain the sustainable development goals: a road map for neglected tropical diseases 2021–2030. Geneva: World Health Organization; 2020. Licence: CC BY-NC-SA 3.0 IGO.
2. Molyneux DH, Asamoah-Bah A, Fenwick A, Savioli L, Hotez P. The history of the neglected tropical disease movement. *Trans R Soc Trop Med Hyg.* 2021;115(2):169–75. <https://doi.org/10.1093/trstmh/trab015> PMID: 33508096
3. Global report on neglected tropical diseases 2023. Geneva: World Health Organization; 2023. Licence: CC BY-NC-SA 3.0 IGO.
4. Hirsch LA, Martin R. LSHTM and colonialism: a report on the Colonial History of the London School of Hygiene & Tropical Medicine (1899–c.1960). London: London School of Hygiene & Tropical Medicine; 2022. <https://doi.org/10.17037/PUBS.04666958>
5. Abimbola S, Pai M. Will global health survive its decolonisation? *Lancet.* 2020;396(10263):1627–8. [https://doi.org/10.1016/S0140-6736\(20\)32417-X](https://doi.org/10.1016/S0140-6736(20)32417-X) PMID: 33220735
6. Abbasi K, Ali P, Barbour V, Benfield T, Bibbins-Domingo K, Hancocks S, et al. Time to treat the climate and nature crisis as one indivisible global health emergency. *BMJ.* 2023;383:p2355. <https://doi.org/10.1136/bmj.p2355>
7. Fournet N, Voiry N, Rozenberg J, Bassi C, Cassonnet C, Karch A, et al. A cluster of autochthonous dengue transmission in the Paris region - detection, epidemiology and control measures, France, October 2023. *Euro Surveill.* 2023;28(49):2300641. <https://doi.org/10.2807/1560-7917.ES.2023.28.49.2300641> PMID: 38062947

8. Faber WR, Hoekzema R, Bart A, Zeegelaar JE, de Vries HJH. Cutaneous leishmaniasis acquired in Jura, France. *Emerg Infect Dis*. 2012;18(1):183–4. <https://doi.org/10.3201/eid1801.110408> PMID: [22257720](https://pubmed.ncbi.nlm.nih.gov/22257720/)
9. Fischer D, Thomas SM, Suk JE, Sudre B, Hess A, Tjaden NB, et al. Climate change effects on Chikungunya transmission in Europe: geospatial analysis of vector's climatic suitability and virus' temperature requirements. *Int J Health Geogr*. 2013;12:51. <https://doi.org/10.1186/1476-072X-12-51> PMID: [24219507](https://pubmed.ncbi.nlm.nih.gov/24219507/)
10. Salvador F, Treviño B, Sulleiro E, Pou D, Sánchez-Montalvá A, Cabezas J, et al. Trypanosoma cruzi infection in a non-endemic country: epidemiological and clinical profile. *Clin Microbiol Infect*. 2014;20(7):706–12. <https://doi.org/10.1111/1469-0691.12443> PMID: [24329884](https://pubmed.ncbi.nlm.nih.gov/24329884/)
11. Zachariah R, Harries AD, Srinath S, Ram S, Viney K, Singogo E, et al. Language in tuberculosis services: can we change to patient-centred terminology and stop the paradigm of blaming the patients? *Int J Tuberc Lung Dis*. 2012;16(6):714–7. <https://doi.org/10.5588/ijtld.11.0635> PMID: [22613683](https://pubmed.ncbi.nlm.nih.gov/22613683/)
12. Addisu A, Adriaansen W, Balew A, Asfaw M, Diro E, Garba Djirmay A, et al. Neglected tropical diseases and the sustainable development goals: an urgent call for action from the front line. *BMJ Glob Health*. 2019;4(1):e001334. <https://doi.org/10.1136/bmjgh-2018-001334> PMID: [30899568](https://pubmed.ncbi.nlm.nih.gov/30899568/)
13. Duck M. Let them talk and we listen: what are diseases of neglected people?. *Int Health*. 2024;16(Supplement\_1):i5–6. <https://doi.org/10.1093/inthealth/ihae007> PMID: [38547344](https://pubmed.ncbi.nlm.nih.gov/38547344/)
14. Alvarez-Arango S, Ogunwole SM, Sequist TD, Burk CM, Blumenthal KG. Vancomycin infusion reaction - moving beyond “Red Man Syndrome” *N Engl J Med*. 2021;384(14):1283–6. <https://doi.org/10.1056/NEJMp2031891> PMID: [33830710](https://pubmed.ncbi.nlm.nih.gov/33830710/)
15. Cerdeña JP, Plaisime MV, Tsai J. From race-based to race-conscious medicine: how anti-racist uprisings call us to act. *Lancet*. 2020;396(10257):1125–8. [https://doi.org/10.1016/S0140-6736\(20\)32076-6](https://doi.org/10.1016/S0140-6736(20)32076-6) PMID: [33038972](https://pubmed.ncbi.nlm.nih.gov/33038972/)
